# Supplementary material for: CRISPR/Cas9-mediated GJA8 knockout in rabbits recapitulates human congenital cataracts
Source: PubMed Central journal article supplement (PMC4766569; doi:10.1038/srep22024), 2016-02-25

## **Supplemental Information**

### **CRISPR/Cas9-mediated *GJA8* knockout in rabbit recapitulates human congenital cataracts**

Lin Yuan, Tingting Sui, Mao Chen, Jichao Deng, Yongye Huang, Jian Zeng, Qingyan Lv, Yuning Song, Zhanjun Li, Liangxue Lai

## **Inventory of Supplemental Information**

### **1. Supplemental Figures**

### **2. Supplemental Tables**

### **3. Original file for Figures**

## 1. Supplemental Figures

Fig S1. (A) Chimeras analysis of the ear and lens from F0-8 rabbit. Black arrow indicates the band of WT allele (367 bp). DL2000, marker. (B) Typical phenotypes of cataracts were determined in founder rabbits of F0-1, F0-3, F0-5, F0-7 and F0-11. (C) Photograph of a cataractous rabbit with *GJA8* mutation at the age of 3 months old.

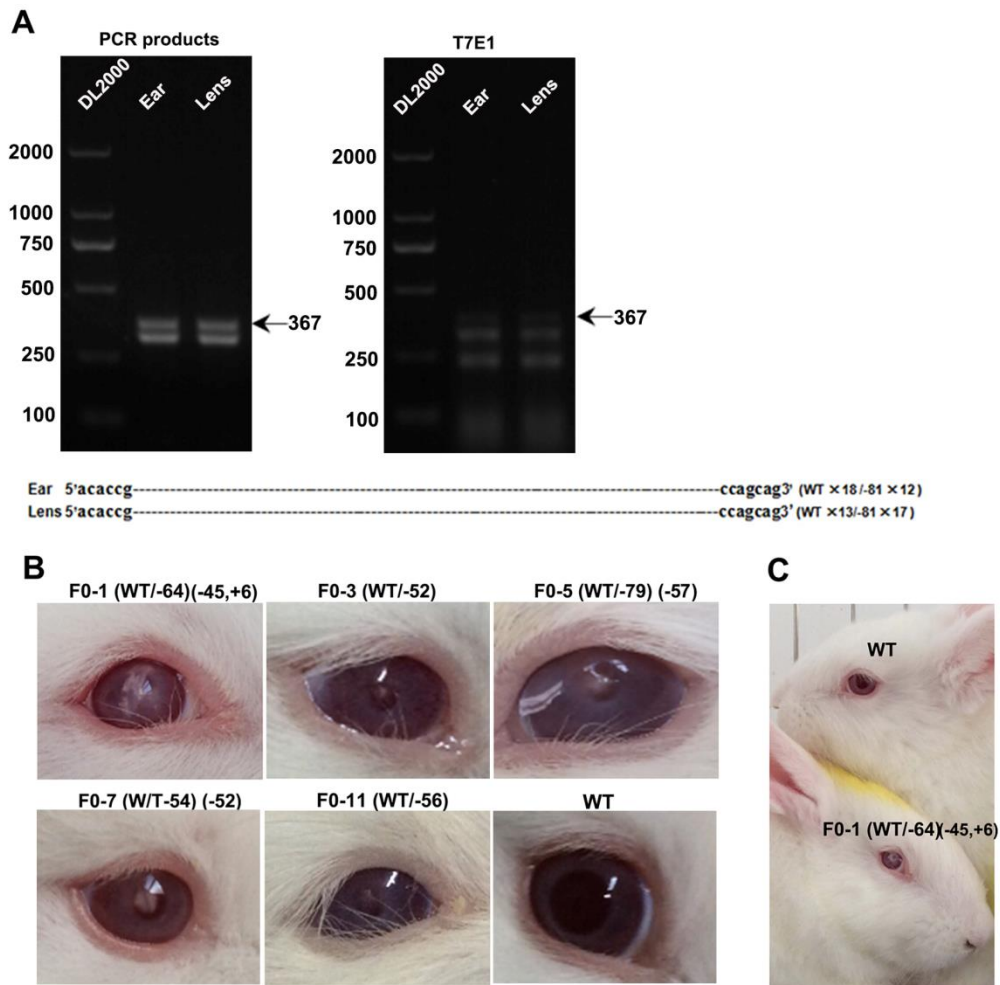

## 2 . Supplement Tables

Table S1. Two strands of oligonucleotides were used to construct the pUC57-sgRNA vector.

| Target gene | Target site          | PAM | Oligonucleotide1       | Oligonucleotide2       |
|-------------|----------------------|-----|------------------------|------------------------|
| S1          | GGCATGGCCACGTACATGA  | GGG | TAGGCATGGCCACGTACATGA  | AAACTCATGTACGTGGGCCATG |
| S2          | GGAGAAGCGCAAGGACCGCG | AGG | TAGGAGAAGCGCAAGGACCGCG | AAACCGGGTCCTTGCGCTTCT  |

Table S2. Alleles from the F0 generation rabbits.

| Founder No. | Target site mutations  | Sequenced clones | Phenotype |
|-------------|------------------------|------------------|-----------|
| F0-1        | WT                     | 10               | +         |
|             | Del 64 bp              | 12               |           |
|             | Del 45 bp, insert 6    | 8                |           |
| F0-2        | WT                     | 18               | +         |
|             | Del 52 bp              | 15               |           |
| F0-3        | WT                     | 17               | +         |
|             | Del 53 bp              | 13               |           |
| F0-4        | WT                     | 19               | -         |
|             | Del 57 bp              | 12               |           |
| F0-5        | WT                     | 12               | +         |
|             | Del 79 bp              | 11               |           |
|             | Del 57 bp              | 9                |           |
| F0-6        | WT                     | 14               | -         |
|             | Del 51 bp              | 16               |           |
| F0-7        | WT                     | 8                | +         |
|             | Del 52 bp              | 13               |           |
|             | Del 54 bp              | 9                |           |
| F0-8        | WT                     | 18               | +         |
|             | Del 81 bp              | 12               |           |
| F0-9        | WT                     | 21               | +         |
|             | Del 56 bp; insert 3 bp | 9                |           |
| F0-10       | WT                     | 11               | -         |
|             | Del 51 bp              | 14               |           |
|             | Del 44 bp; insert 3 bp | 7                |           |
| F0-11       | WT                     | 14               | +         |
|             | Del 12 bp              | 10               |           |
|             | Del 56 bp; insert 3 bp | 7                |           |

Note: WT: wild type allele; Del: deletion; insert: insertion.

Table S3. Primer sequences of potential off target sites for *GJA8* gene.

|    | Gene locus      | Potential off target sites | Mismatch    | Primer sequences (5'-3')                                |
|----|-----------------|----------------------------|-------------|---------------------------------------------------------|
| S1 | Chum:+250369    | AGGGTAGCGAAAGGACCGCGGAG    | [1:3:5:10]  | F:AGGCACCTCAAGGCATTT<br>R:GTGTATGCCTTCTCACACCTC         |
|    | chr1:+184316759 | GGAGCAGCTCTAGGACCGCGCGG    | [5:9:11]    | F:TAGCGACACAGGTGGGAAA<br>R:GGAGGCTCTACAGGACACTAATC      |
|    | chr9:+59430291  | GGAGCGGCGCTAGGACCGCGGGG    | [5:9:11]    | F:GACAATCCAAGTCCACAGAAGT<br>R:AGATGGGAATGGAAAGAAGGC     |
|    | chr21-698463    | GCAGGAGGTCAAGGACCGCGCAG    | [2:5:8:9]   | F:CCAAATGCCTGCTTATGTTTCT<br>R:GGGTCCTTATAGGAGGAAGTTAGA  |
|    | chr12-142395190 | GCAAGAGCTCAAGGACCGCGAAG    | [2:4:5:9]   | F:CCAAATGCCTGCTTATGTTTCT<br>R:CTTCTGTTTCTCCCTCTGATG     |
|    | chrUN0:-10369   | TCAGAAGGGCCAGGACCGCGCGG    | [1:2:8:11]  | F:GGACTAGGAATAGCTCAACAAGAA<br>R:GGCAGCACAATGACGATTTAC   |
|    | chr16-20577150  | GCAGCAGAGCAAGGACCGCCAG     | [2:5:8:20]  | F:TCGCTCACCTGCCTCGGCGACG<br>R:GTTCTGGAACCTAAGAGGCCAC    |
| S2 | chrUN0:-304499  | CCCAGGGCCACGTACATGAGAG     | [1:2:5]     | F:GCTCTGCACAGTGACCTTTA<br>R:CCTTCCCAGGCAAGAGTTATC       |
|    | chr1:+90977471  | GGCCTGGCTCACGTACATGTGGG    | [4:9:20]    | F:CAAGAGTCCAACCACGTCTT<br>R:TTCTGGGAAATGATCCGTGATAG     |
|    | chrUN0:+885137  | TGTGTGGCCAGGTACATGAGGG     | [1:3:4:12]  | F:CGAGAGCAGGAAGCTCATAAAG<br>R:CAGACTTGTGCTGTGAGTGTAG    |
|    | chr7:+155044047 | ATCATGGCCAACGTACATGGCAG    | [1:2:10:20] | F:GTAGAAAGCAGTCTGGCCTATG<br>R:GGATGTTGAGGCAGTGAGTATATTA |
|    | chr4:-45197482  | GACATGGGTCATGTACATGAGAG    | [2:8:9:12]  | F:TGCTTCCAGTTATGGGTGTTAT<br>R:TTCATATCCAATCTGCCTGTC     |
|    | chr1:+126065974 | GTGATGGCTCAAGTACATGAGAG    | [2:3:9:12]  | F:CACCAAGTGGAAATGTGGTTAGA<br>R:CCATGTGAGATACTGTGCTTCC   |
|    | chr15:+38358573 | GGCGGAGCCCATGTACATGAAGG    | [4:5:6:12]  | F:CACCTCTGCTTGTCTCTAACC<br>R:CTTCCCACCCACACTTCTATC      |

Table S4 . Alleles from the F1 generation rabbits.

| Intercross-F0<br>(Male*Female) | F1 generation No.      | Target site mutations  | Sequenced<br>cononies | Phenotype |   |
|--------------------------------|------------------------|------------------------|-----------------------|-----------|---|
| F0-7* F0-4                     | F1-1                   | Del 52 bp              | 8                     | +         |   |
|                                |                        | Del 57 bp              | 12                    |           |   |
|                                | F1-2                   | WT                     | 15                    | -         |   |
|                                |                        | Del 54 bp              | 5                     |           |   |
|                                | F1-3                   | WT                     | 20                    | -         |   |
|                                | F1-4                   | WT                     | 11                    | +         |   |
|                                |                        | Del 52 bp              | 9                     |           |   |
|                                | F1-5                   | WT                     | 20                    | -         |   |
|                                | F1-6                   | WT                     | 14                    | -         |   |
|                                |                        | Del 57 bp              | 6                     |           |   |
|                                | F1-7                   | WT                     | 6                     | -         |   |
|                                |                        | Del 57 bp              | 14                    |           |   |
|                                | F0-5* F0-8             | F1-8                   | WT                    | 13        | + |
|                                |                        |                        | Del 79 bp             | 7         |   |
| F1-9                           |                        | WT                     | 12                    | +         |   |
|                                |                        | Del 79 bp              | 8                     |           |   |
| F1-10                          |                        | WT                     | 20                    | -         |   |
| F1-11                          |                        | WT                     | 7                     | +         |   |
|                                |                        | Del 79 bp              | 13                    |           |   |
| F1-12                          |                        | WT                     | 20                    | -         |   |
| F1-13                          |                        | WT                     | 9                     | +         |   |
|                                |                        | Del 79 bp              | 11                    |           |   |
| F1-14                          |                        | WT                     | 9                     | +         |   |
|                                |                        | Del 79 bp              | 13                    |           |   |
| F1-15                          |                        | WT                     | 20                    | -         |   |
| F1-16                          |                        | WT                     | 20                    | -         |   |
| F1-17                          | WT                     | 12                     | +                     |           |   |
|                                | Del 79 bp              | 9                      |                       |           |   |
| F0-7* F0-9                     | F1-18                  | WT                     | 12                    | +         |   |
|                                |                        | Del 52 bp              | 10                    |           |   |
|                                | F1-19                  | WT                     | 11                    | +         |   |
|                                |                        | Del 52 bp              | 9                     |           |   |
|                                | F1-20                  | WT                     | 13                    | +         |   |
|                                |                        | Del 52 bp              | 7                     |           |   |
|                                | F1-21                  | WT                     | 13                    | +         |   |
|                                |                        | Del 54 bp              | 7                     |           |   |
|                                | F1-22                  | WT                     | 8                     | +         |   |
|                                |                        | Del 56 bp; insert 3 bp | 12                    |           |   |
|                                | F1-23                  | WT                     | 15                    | +         |   |
|                                |                        | Del 52 bp              | 5                     |           |   |
| F1-24                          | WT                     | 13                     | +                     |           |   |
|                                | Del 56 bp; insert 3 bp | 7                      |                       |           |   |

Note: WT: wild type allele; Del: deletion; insert: insertion.

### 3. Original file for Figures

#### 3.1 Authors' original file for figure 1C

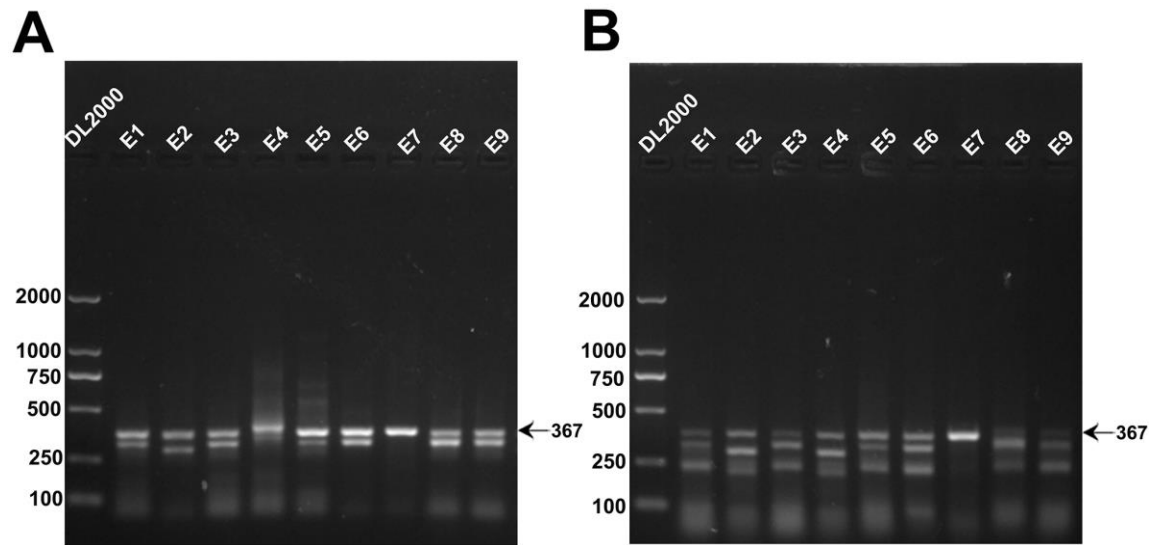

3.2 Authors' original file for figure 2B

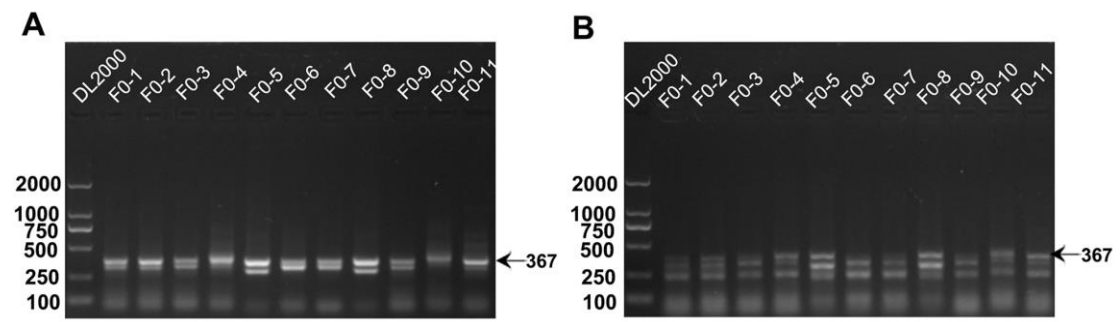



3.3 Authors' original file for figure 3C and 3D

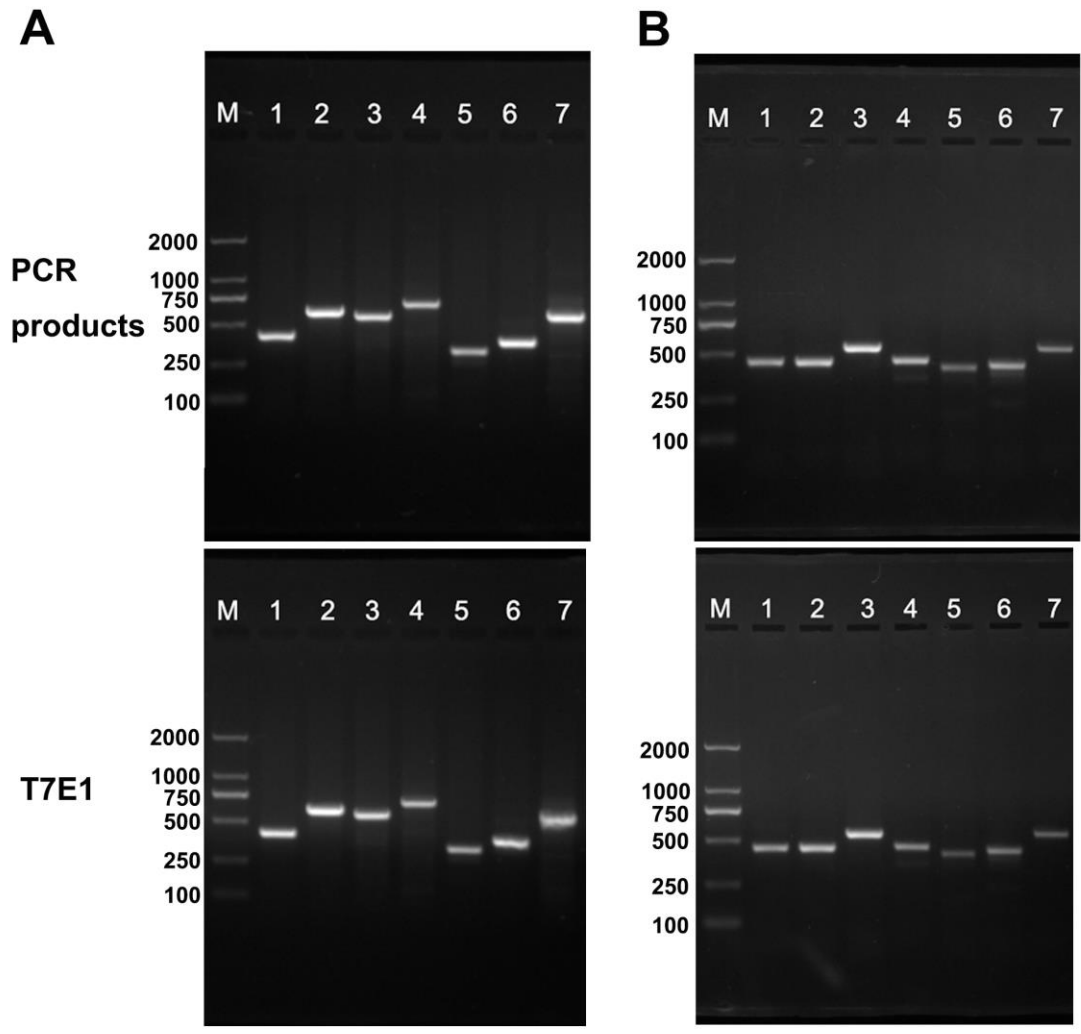

3.4 Authors' original file for figure 5A

**A**

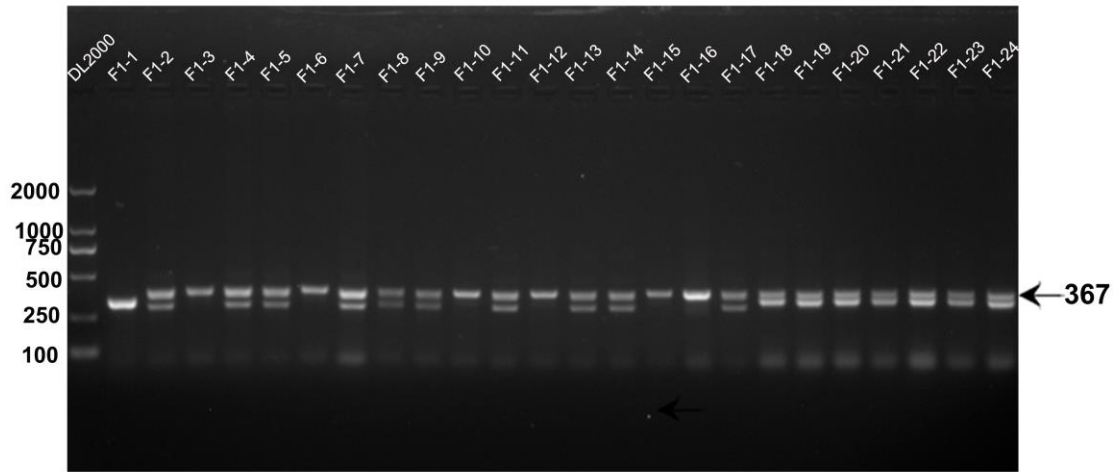

**B**

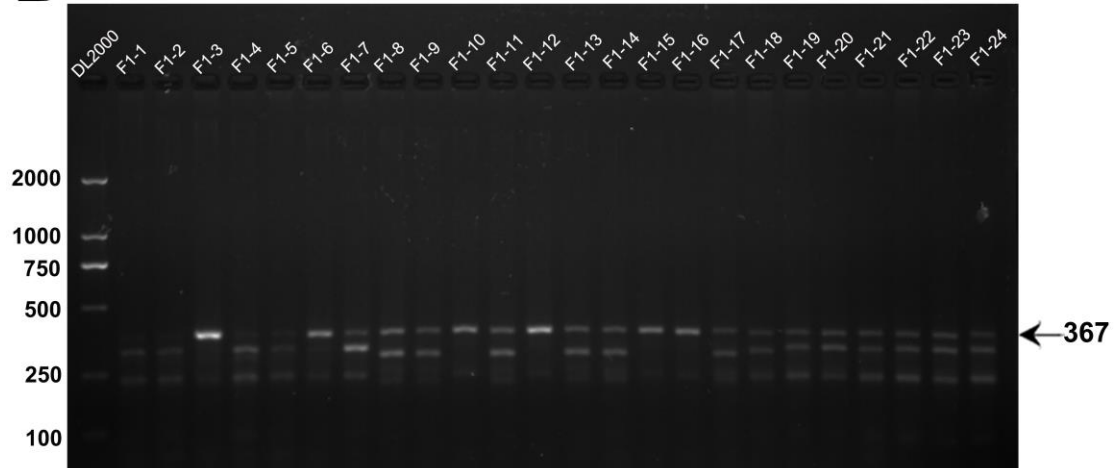

Supplement: srep22024-s1.pdf [file srep22024-s1.pdf]
